# Supplementary material
Source: PubMed Central journal article supplement (PMC4411948)
Supplement: NIHMS679117-supplement-S1.pdf [file NIHMS679117-supplement-S1.pdf]

Supplementary Table S1. BLAST analysis of oxidoreductases in *E. coli*

| ECO Gene # | Oxidoreductases | BLAST (Exclude <i>Escherichia</i> (taxid:561)) Domains, likely substrate preference, cofactor, etc | Literature available? | Protein BLAST against known <i>E. coli</i> ALR/ADH Enzymes* |          |          |          |          |          | BLAST <i>E. coli</i> genome against ALR/ADH Enzymes found |          |      |          |          |          |
|------------|-----------------|----------------------------------------------------------------------------------------------------|-----------------------|-------------------------------------------------------------|----------|----------|----------|----------|----------|-----------------------------------------------------------|----------|------|----------|----------|----------|
|            |                 |                                                                                                    |                       | YqhD                                                        | AdhP     | EutG     | YiaY     | YjgB     | FucO     | Beta                                                      | DkgA     | YahK | GidA     | Ybbo     | YghA     |
| EG10425    | HdhA            | 7-alpha-hydroxysteroid dehydrogenase, NAD(P)-binding, Rossmann family                              |                       |                                                             |          |          |          |          |          |                                                           |          |      |          |          |          |
| EG10993    | Tdh             | L-threonine 3-dehydrogenase                                                                        | Yes                   |                                                             | 5.00E-26 |          |          | 7.00E-09 |          |                                                           | 1.00E-12 |      |          | 5.00E-08 | 3.00E-22 |
| EG11134    | YdjA            | FMN Nitroreductase family, NAD(P)                                                                  | Yes                   |                                                             |          |          |          |          |          |                                                           |          |      |          |          |          |
| EG11292    | YghA            | Short Chain dehydrogenase/reductase family, NAD-binding, Rossmann Family                           |                       |                                                             |          |          |          |          |          |                                                           |          |      |          |          |          |
| EG11309    | YdbC            | Aldo/Keto reductase family, aryl-alcohol dehydrogenase                                             |                       |                                                             |          |          |          |          |          |                                                           | 2.00E-06 |      |          |          |          |
| EG11315    | YhdH            | Quinone oxidoreductase family, Zn-binding dehydrogenase/oxidoreductase, alcohol dehydrogenase      |                       | 0.12                                                        | 5.00E-04 | 0.36     |          | 0.016    |          |                                                           |          | 2.6  |          | 0.13     |          |
| EG11581    | YbiC            | Malate/lactate dehydrogenase family                                                                |                       |                                                             |          |          |          |          |          |                                                           |          |      |          |          |          |
| EG11648    | DkgB            | 2,5-diketo-D-gluconic acid reductase B, Aldo/Keto reductase family, methylglyoxal reductase        | Yes                   |                                                             |          |          |          |          |          |                                                           | 2.00E-45 |      |          |          |          |
| EG11759    | YciK            | Short Chain Dehydrogenase, 3-oxoacyl-[ACP] reductase, NAD(P)-binding, Rossmann fold                |                       |                                                             |          |          |          |          |          |                                                           |          |      |          | 2.00E-13 | 1.00E-09 |
| EG11904    | GidA            | Glycerol dehydrogenase, NAD-binding                                                                | Yes                   |                                                             |          | 0.002    | 1.00E-04 |          | 2.00E-09 |                                                           |          |      |          |          |          |
| EG12019    | YohF            | Short Chain/Acetoacetyl dehydrogenase, 3-oxoacyl-[ACP] reductase, NAD(P), Rossmann fold            |                       |                                                             |          |          |          |          |          |                                                           |          |      |          | 4.00E-10 | 8.00E-18 |
| EG12035    | YeiP            | elongation factor P like protein                                                                   |                       |                                                             |          |          |          |          |          |                                                           |          |      |          |          |          |
| EG12036    | YeiQ            | D-mannoate oxidoreductase/dehydrogenase, Rossmann domain, NAD-binding                              |                       |                                                             |          |          |          |          |          |                                                           |          |      |          |          |          |
| EG12133    | UcpA            | Short Chain Dehydrogenase, 3-oxoacyl-[ACP] reductase, NAD(P)-binding, Rossmann fold                | Yes                   |                                                             |          |          |          |          |          |                                                           |          |      |          | 4.00E-17 | 1.00E-16 |
| EG12185    | YqiB            | dehydrogenase/oxidoreductase                                                                       |                       |                                                             |          |          |          |          |          |                                                           |          |      |          |          |          |
| EG12229    | YhiN            | NAD/FAD dehydrogenase, or pyridine nucleotide-disulfide oxidoreductase                             |                       |                                                             |          |          |          |          |          | 3.5                                                       |          |      |          |          |          |
| EG12292    | GhrB            | Bifunctional glyoxylate/hydroxypyruvate reductase B, 2-hydroxyacid dehydrogenase family            | Yes                   |                                                             |          |          |          |          |          |                                                           |          |      |          |          |          |
| EG12345    | YdfG            | Short Chain Dehydrogenase, 3-oxoacyl-[ACP] reductase, NAD(P)-binding, Rossmann fold                | Yes                   |                                                             |          |          |          |          |          |                                                           |          |      |          | 2.00E-10 | 0.004    |
| EG12361    | KduD            | 2-deoxy-D-gluconate 3-dehydrogenase, NAD(P)-binding, Rossmann family                               | Yes                   |                                                             |          |          |          |          |          |                                                           |          |      |          | 2.00E-04 | 5.00E-13 |
| EG12409    | AegA            | Oxidoreductase, Fe-S binding subunit, Glutamate synthase NADPH small chain                         | Yes                   |                                                             |          |          |          |          |          |                                                           |          |      |          |          |          |
| EG12417    | gatD            | Galactitol-1-phosphate 5-dehydrogenase, Zn-binding dehydrogenase family                            | Yes                   |                                                             | 4.00E-15 |          |          | 1.00E-07 |          |                                                           | 4.00E-10 |      |          |          |          |
| EG12452    | RspB            | dehydrogenase/oxidoreductase, Zn-binding, starvation sensing protein                               | Yes                   |                                                             | 1.00E-24 |          |          | 1.00E-10 |          |                                                           | 6.00E-11 |      |          |          |          |
| EG12540    | IdnO            | 5-keto-D-gluconate 5-reductase, gluconate 5-dehydrogenase, NAD(P)-binding, Rossmann family         | Yes                   |                                                             |          |          |          |          |          |                                                           |          |      |          | 6.00E-07 | 3.00E-14 |
| EG12541    | IdnD            | L-idonate 5-dehydrogenase, GroES-like protein                                                      |                       |                                                             | 5.00E-18 |          |          | 9.00E-09 |          |                                                           | 2.00E-07 |      |          |          |          |
| EG12545    | YjhC            | Gfo/ldh/mocA family oxidoreductase, NAD-binding, Rossmann Family, KpLE2 phage-like element         |                       |                                                             |          |          |          |          |          |                                                           |          |      |          |          |          |
| EG12590    | YjiN            | Sorbitol/galactonate oxidoreductase, Zn-binding, Alcohol dehydrogenase, GroES domain               | Yes                   |                                                             | 5.00E-17 |          |          | 3.00E-11 |          |                                                           | 9.00E-12 |      |          |          |          |
| EG12692    | YbdH            | Oxidoreductase, 3-hydroquinone synthase family, glycerol/alcohol dehydrogenase, Fe-dependent       |                       |                                                             |          |          |          |          |          |                                                           |          |      |          |          |          |
| EG12729    | YgjR            | Oxidoreductase/dehydrogenase, NADH-binding                                                         |                       |                                                             |          |          |          |          |          |                                                           |          |      |          |          |          |
| EG12729    | YgjR            | NAD-binding oxidoreductase, Rossmann Family                                                        |                       |                                                             |          |          |          |          |          |                                                           |          |      |          |          |          |
| EG12809    | yhcC            | Radical SAM superfamily, Fe-S oxidoreductase                                                       |                       |                                                             |          |          |          |          |          |                                                           |          |      |          |          |          |
| EG12927    | YrF             | dehydrogenase, intracellular growth attenuator                                                     | Yes                   |                                                             |          |          |          |          |          |                                                           |          |      |          |          |          |
| EG12944    | YhhX            | NAD(P)-binding, dehydrogenase/oxidoreductase                                                       |                       |                                                             |          |          |          |          |          |                                                           |          |      |          |          |          |
| EG12971    | YgfF            | NAD(P)-binding, Short Chain Dehydrogenase family, Rossmann Fold                                    |                       |                                                             |          |          |          |          |          |                                                           |          |      |          | 2.00E-08 |          |
| EG12976    | YggP            | L-sorbitol-1-phosphate oxidoreductase/dehydrogenase                                                |                       |                                                             | 0.13     |          |          |          |          |                                                           |          |      |          |          |          |
| EG12983    | YggW            | HemN Family oxidoreductase, coproporphyrinogen III oxidase                                         |                       |                                                             |          |          |          |          |          |                                                           |          |      |          |          |          |
| EG13010    | YghZ            | Aldo/keto reductase like, L-glyceraldehyde 3-phosphate reductase                                   | Yes                   |                                                             |          |          |          |          |          |                                                           | 4.00E-05 |      |          |          |          |
| EG13015    | DkgA            | 2,5-diketo-D-gluconic acid reductase A, Aldo/Keto reductase family, methylglyoxal reductase        | Yes                   |                                                             |          |          |          |          |          |                                                           |          |      |          |          |          |
| EG13061    | YgFK            | Selenate reductase                                                                                 |                       |                                                             |          |          |          |          |          |                                                           |          |      |          |          |          |
| EG13063    | YgFM            | Selenate reductase, FAD-binding                                                                    |                       |                                                             |          |          |          |          |          |                                                           |          |      |          |          |          |
| EG13069    | YgFS            | Oxidoreductase, Fe-S subunit, effector protein, electron transporter                               |                       |                                                             |          |          |          |          |          |                                                           |          |      |          |          |          |
| EG13077    | YqFA            | Oxidoreductase, inner membrane protein, hemolysin channel protein                                  |                       |                                                             |          |          |          |          |          |                                                           |          |      |          |          |          |
| EG13093    | Tas             | Aldo/keto reductase family                                                                         | Yes                   |                                                             |          |          |          |          |          |                                                           | 1.00E-08 |      |          |          |          |
| EG13104    | YgbJ            | NAD-binding oxidoreductase/dehydrogenase, D-beta-hydroxy butyrate dehydrogenase                    |                       |                                                             |          |          |          |          |          |                                                           |          |      |          |          |          |
| EG13121    | YgcN            | NAD/FAD oxidoreductase, electron transfer flavoprotein-quinone oxidoreductase                      |                       |                                                             |          |          |          |          |          | 3.5                                                       |          |      |          |          |          |
| EG13128    | YgcU            | FAD-binding oxidoreductase/dehydrogenase, alkylglycerone-phosphate synthase                        |                       |                                                             |          |          |          |          |          |                                                           |          |      |          |          |          |
| EG13130    | YgcW            | Oxidoreductase, Short chain dehydrogenase family, 2-deoxy-D-gluconate 3-dydrogenase                |                       |                                                             |          |          |          |          |          |                                                           |          |      |          | 4.00E-11 | 3.00E-14 |
| EG13262    | Ybbo            | NAD(P)-binding, Short Chain Dehydrogenase family, Rossmann Fold                                    |                       |                                                             |          |          |          |          |          |                                                           |          |      |          |          | 2.00E-09 |
| EG13420    | YdhF            | Aldo/keto oxidoreductase family                                                                    |                       |                                                             |          |          |          |          |          |                                                           |          |      |          |          |          |
| EG13464    | YphC            | Alcohol Dehydrogenase, Zn-binding, NAD(P)-binding                                                  | Yes                   |                                                             | 8.00E-20 |          |          | 1.00E-07 |          |                                                           | 2.00E-05 |      |          |          |          |
| EG13483    | YdjG            | Aldo/keto reductase family                                                                         | Yes                   |                                                             |          |          |          |          |          |                                                           | 2.00E-10 |      |          |          |          |
| EG13486    | YdjJ            | Alcohol/sorbitol Dehydrogenase, Zn-binding, GroES-like protien                                     |                       |                                                             | 8.00E-23 |          |          | 3.00E-07 |          |                                                           |          |      | 4.00E-10 |          |          |
| EG13488    | YdjL            | Alcohol Dehydrogenase, Zn-binding, NAD(P)-binding                                                  |                       |                                                             | 9.00E-17 |          |          | 3.00E-09 |          |                                                           |          |      | 1.00E-06 |          |          |
| EG13491    | YeaE            | aldehyde reductase, Aldo/Keto reductase family                                                     | Yes                   |                                                             |          |          |          |          |          |                                                           | 7.00E-22 |      |          |          |          |
| EG13510    | YeaX            | Dioxygenase subunit, oxidoreductase, FAD/NAD-binding, iron-sulfur cluster                          |                       |                                                             |          |          |          |          |          |                                                           |          |      |          |          |          |
| EG13537    | YbdR            | Alcohol Dehydrogenase, Zn-binding, GroES-like protien                                              |                       |                                                             |          | 2.00E-15 |          | 3.00E-05 |          |                                                           | 8.00E-05 |      |          |          |          |
| EG13580    | YkcC            | Pyridine nucleotide-disulfide oxidoreductase                                                       |                       |                                                             |          |          |          |          |          |                                                           |          |      |          |          |          |
| EG13582    | YkeE            | L-lactate dehydrogenase, dehydrogenase subunit, Fe-S oxidoreductase subunit                        |                       |                                                             |          |          |          |          |          |                                                           |          |      |          |          |          |
| EG13595    | YahK            | Alcohol Dehydrogenase, Zn-binding, NAD(P)-binding                                                  | Yes                   |                                                             | 7.00E-30 |          |          | 2.00E-46 |          |                                                           |          |      |          |          |          |
| EG13611    | YajO            | NAD(P)-xylose reductase, Aldo/Keto reductase family, 2-carboxybenzaldehyde reductase               | Yes                   |                                                             |          |          |          |          |          |                                                           |          |      |          |          |          |
| EG13683    | YbjN            | Sensory transduction regulator                                                                     |                       |                                                             |          |          |          |          |          |                                                           |          |      |          |          |          |
| EG13688    | YbjS            | NAD dependent epimerase/dehydratase family                                                         |                       |                                                             |          |          |          |          |          |                                                           |          |      |          |          |          |
| EG13689    | YbjT            | dTDP-glucose enzyme, epimerase/dehydratase, NAD(P)-binding, Rossmann family                        |                       |                                                             |          |          |          |          |          |                                                           |          |      |          | 0.058    |          |
| EG13869    | GhrA            | Bifunctional glyoxylate/hydroxypyruvate reductase A, 2-hydroxyacid dehydrogenase family            | Yes                   |                                                             |          |          |          |          |          |                                                           |          |      |          |          |          |
| EG13879    | YceM            | Virulence Factor, oxidoreductase, NAD-binding                                                      |                       |                                                             |          |          |          |          |          |                                                           |          |      |          |          |          |
| EG13914    | YcqQ            | Alcohol Dehydrogenase, Zn-binding                                                                  |                       |                                                             |          | 2.00E-05 |          |          |          |                                                           |          |      |          |          |          |
| EG13916    | YcjS            | Oxidoreductase/dehydrogenase, NADH-binding                                                         |                       |                                                             |          |          |          |          |          |                                                           |          |      |          |          |          |
| EG13931    | YdgJ            | NAD-binding, oxidoreductase, Rossmann fold                                                         |                       |                                                             |          |          |          |          |          |                                                           |          |      |          |          |          |
| EG13956    | YdhV            | Aldehyde ferredoxin oxidoreductase                                                                 | Yes                   |                                                             |          |          |          |          |          |                                                           |          |      |          |          |          |
| EG14200    | YfgD            | Arsenate reductase                                                                                 |                       |                                                             |          |          |          |          |          |                                                           |          |      |          |          |          |
| EG14262    | YciW            | Oxidoreductase, amidase/aminotransferase                                                           |                       |                                                             |          |          |          |          |          |                                                           |          |      |          |          |          |
| EG14420    | YmjC            | Dehydratase/epimerase. NAD(P)-binding, Rossmann Fold                                               |                       |                                                             |          |          |          |          |          |                                                           |          |      |          |          |          |
| EG50010    | FrmA            | Class III alcohol dehydrogenase, S-(hydroxymethyl)glutathione dehydrogenase                        | Yes                   |                                                             | 6.00E-28 |          |          | 7.00E-08 |          |                                                           |          |      | 6.00E-16 |          |          |

\*Expected activity <math>\leq 2.00 \times 10^{-20}</math> or less was selected as more likely candidates

Candidates for screening
